# Selective $\beta_1$ -Antagonism with Bisoprolol Is Associated with Fewer Postoperative Strokes than Atenolol or Metoprolol

## A Single-center Cohort Study of 44,092 Consecutive Patients

Catherine Ashes, M.B.B.S.,\* Saul Judelman, M.B.B.S.,† Duminda N. Wijeyesundera, M.D., Ph.D.,‡ Gordon Tait, Ph.D.,§ C. David Mazer, M.D.,|| Gregory M. T. Hare, M.D., Ph.D.,# W. Scott Beattie, M.D., Ph.D.\*\*

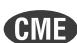

This article has been selected for the ANESTHESIOLOGY CME Program. Learning objectives and disclosure and ordering information can be found in the CME section at the front of this issue.

\* Cardiac Anesthesia Fellow, Department of Anesthesia, University Health Network, Toronto, Ontario, Canada. † Cardiac Anesthesia Fellow, Department of Anesthesia, St. Michael's Hospital and the University of Toronto, Toronto, Ontario, Canada. ‡ Assistant Professor, Department of Anesthesia, University Health Network; Li Ka Shing Knowledge Institute of St. Michael's Hospital; Institute of Health Policy Management and Evaluation; and University of Toronto. § Assistant Professor, Department of Anesthesia, University Health Network, and University of Toronto. || Professor, Department of Anesthesia, St. Michael's Hospital and the University of Toronto, and Li Ka Shing Knowledge Institute of St. Michael's Hospital. # Associate Professor, Department of Anesthesia, St. Michael's Hospital and the University of Toronto, and Li Ka Shing Knowledge Institute of St. Michael's Hospital. \*\* Professor, Department of Anesthesia, University Health Network; The Peter Munk Cardiac Centre (within Toronto General Hospital), Toronto, Ontario, Canada; and University of Toronto.

Received from the Department of Anesthesia and Pain Management, University Health Network, Toronto, Ontario, Canada. Submitted for publication March 4, 2013. Accepted for publication June 12, 2013. The investigation is supported in part by the Research and Innovation Fund from the Department of Anesthesia and Pain Management at the University Health Network and the Department of Anesthesia, St. Michael's Hospital, Toronto, Ontario, Canada, University of Toronto, Department of Anesthesia. Dr. Beattie is supported by the R. Fraser Elliott Chair in Cardiac Anesthesia Research. Drs. Beattie, Wijeyesundera, Hare, and Mazer are supported in part by Merit Awards from the Department of Anesthesia at the University of Toronto. Dr. Wijeyesundera is supported in part by a Clinician-Scientist Award from the Canadian Institute of Health Research (Ottawa, Ontario, Canada). Dr. Hare has received research funding from Forest Laboratories, Inc. (New York, New York). The Research and Innovation Fund of the Department of Anesthesia at the University Health Network, Toronto, Ontario, Canada, has received donations from Abbott Corp (Saint Laurent, Quebec, Canada), Bristol-Meyers Squibb (Toronto, Ontario), Healthcare, Bayer Inc. (Toronto, Ontario, Canada), Fresenius Kabi (Richmond Hill, Ontario, Canada), and General Electric Healthcare (Mississauga, Ontario, Canada). None of these companies has participated in any aspect of this report. This study was presented in abstract form at the Annual Meeting of the Canadian Anesthesiologists' Society, Quebec City, Quebec, Canada, June 17, 2012.

Address correspondence to Dr. Beattie: Department of Anesthesia, University of Toronto, 200 Elizabeth Street, 3EN, Toronto, Ontario M5G 2C4, Canada. scott.beattie@uhn.ca. This article may be accessed for personal use at no charge through the Journal Web site, [www.anesthesiology.org](http://www.anesthesiology.org).

Copyright © 2013, the American Society of Anesthesiologists, Inc. Lippincott Williams & Wilkins. Anesthesiology 2013; 119:777-87

### What We Already Know about This Topic

- Perioperative  $\beta$ -blockade has been associated in one large study with an increased risk of stroke
- $\beta$ -blockade might predispose to stroke by attenuating  $\beta_2$ -adrenoceptor-mediated cerebral vasodilation, in which case a  $\beta_1$ -selective agent might reduce this risk

### What This Article Tells Us That Is New

- In a propensity-adjusted cohort study on approximately 2,500 patients undergoing noncardiac, nonneurologic surgery with perioperative  $\beta$ -blockade, those receiving the  $\beta_1$ -selective agent, bisoprolol, had a five-fold reduced risk of stroke compared with those receiving nonselective  $\beta$ -blockers
- Randomized controlled trials comparing these agents are needed

## ABSTRACT

**Background:** Perioperative metoprolol increases postoperative stroke. Animal studies indicate that the mechanism may be related to attenuated  $\beta_2$ -adrenoreceptor-mediated cerebral vasodilation. The authors therefore conducted a cohort to study whether the highly  $\beta_1$ -specific  $\beta$ -blocker (bisoprolol) was associated with a reduced risk of postoperative stroke compared with less selective  $\beta$ -blockers (metoprolol or atenolol).

**Methods:** The authors conducted a single-center study on 44,092 consecutive patients with age 50 yr or more having noncardiac, nonneurologic surgery. The primary outcome was stroke within 7 days of surgery. The secondary outcome was a composite of all-cause mortality, postoperative myocardial injury, and stroke. A propensity score-matched cohort was

◇ This article is featured in "This Month in Anesthesiology." Please see this issue of ANESTHESIOLOGY, page 1A.

created to assess the independent association between bisoprolol and less  $\beta_1$ -selective agents metoprolol or atenolol. A secondary analysis using logistic regression, based on previously identified confounders, also compared selective  $\beta_1$ -antagonism.

**Results:** Twenty-four percent (10,756) of patients were exposed to in-hospital  $\beta$ -blockers. A total of 88 patients (0.2%) suffered a stroke within 7 days of surgery. The matched cohort consisted of 2,462 patients, and the pairs were well matched for all variables. Bisoprolol was associated with fewer postoperative strokes than the less selective agents (odds ratio = 0.20; 95% CI, 0.04–0.91). Multivariable risk-adjustment in the  $\beta$ -blockers-exposed patients comparing bisoprolol with the less selective agents was associated with a similarly reduced stroke rate.

**Conclusions:** The use of metoprolol and atenolol is associated with increased risks of postoperative stroke, compared with bisoprolol. These findings warrant confirmation in a pragmatic randomized trial.

THE initial enthusiastic use of perioperative  $\beta$ -blockers, which was largely based on two positive trials,<sup>1,2</sup> has been tempered after the publication of the results of the Perioperative Ischemia Evaluation (POISE) trial.<sup>3</sup> POISE trial demonstrated that although metoprolol succinate reduced the risk of perioperative myocardial infarction, it also doubled the incidence of postoperative stroke and increased mortality. This finding was also confirmed by subsequent meta-analyses that showed a similar reduction in myocardial infarction and increase in stroke rates in all perioperative trials that used either formulation of metoprolol (tartate and succinate) or atenolol.<sup>4</sup>

The specific reasons why perioperative  $\beta$ -blockade may cause acute stroke have not been elucidated. A potential mechanism is impairment in normal physiological responses to significant perioperative blood loss, which is also associated with postoperative stroke.<sup>3</sup> Notably, the sequelae of major surgical blood loss, namely acute perioperative anemia, is both common<sup>5</sup> and entails adaptive homeostatic responses that include increases in cardiac output,<sup>6</sup> cerebral blood flow, and cerebrovascular dilatation.<sup>7,8</sup> Less selective  $\beta$ -antagonists have the potential to impair all of these adaptive responses.

To further explore this potential mechanism for perioperative stroke, we undertook a series of animal experiments to investigate the separate roles of  $\beta_1$ - and  $\beta_2$ -adrenergic receptors in mediating the physiologic response to acute anemia. In a rat model of acute anemia, the use of a weakly  $\beta_1$ -selective  $\beta$ -blocker metoprolol (relative  $\beta_1/\beta_2$  affinity of 2.3) impaired the cardiac output response and reduced brain tissue  $\text{PO}_2$ , thereby causing global cerebral hypoxia.<sup>9</sup> In addition, the specific antagonism of the  $\beta_2$ -receptor in the setting of acute anemia attenuated  $\beta_2$ -mediated cerebral vascular dilation<sup>10</sup> and reduced brain  $\text{PO}_2$ .<sup>11</sup> In comparison, treatment with a low dose of a highly  $\beta_1$ -selective  $\beta$ -blocker, nebivolol, effectively inhibited the cardiac response to anemia without attenuating brain  $\text{PO}_2$ , possibly by preserving the vascular response to acute anemia.<sup>12</sup>

These experimental data suggest that the relative  $\beta_1$ -selectivity of  $\beta$ -blockers may influence their efficacy in preventing postoperative cardiovascular outcomes, as has been suggested by a recent meta-analysis.<sup>13</sup> Notably, the three most commonly used chronic  $\beta$ -blockers in clinical practice vary with respect to their  $\beta$ -receptor selectivity. Specifically, their relative  $\beta_1/\beta_2$  affinities are: 2.3 for metoprolol, 4.7 for atenolol, and 13.5 for bisoprolol.<sup>14,15</sup>

We therefore undertook this retrospective cohort study to evaluate the association of  $\beta$ -blocker selectivity with the risk of postoperative acute stroke. Our primary hypothesis was that a more  $\beta_1$ -selective agent, namely bisoprolol, would be associated with lower adjusted risk of postoperative stroke than the less selective antagonists such as metoprolol or atenolol.

## Materials and Methods

### Study Setting, Sample, and Data Collection

We conducted a single-center, retrospective cohort study on patients having intermediate- to high-risk noncardiac surgery at the University Health Network in Toronto, Ontario, Canada. The study conformed to the Strengthening the Reporting of Observational Studies in Epidemiology guidelines. The University Health Network, which is a teaching hospital network affiliated to the University of Toronto (Toronto, Ontario, Canada), offers a full range of adult noncardiac surgery performed at three sites. This study was initiated after the approval by the University Health Network Institutional Research Ethics Board (Toronto, Ontario, Canada), which waived the requirement for informed consent for this study.

We evaluated consecutive patients who were aged 50 yr or older, had American Society of Anesthesiologists physical status scores of four or less, underwent noncardiac and nonneurologic surgery from January 2003 to December 2010, and required an overnight admission to hospital. We also excluded patients who underwent solid organ transplantation. To define the timing of each stroke, the first surgery was considered as the index in patients having more than one surgery during the admission.

All perioperative data were prospectively collected in linked institutional databases, as has been previously described.<sup>5,16,17</sup> These data included demographics, comorbidities, medications, surgical information, laboratory test results, blood product transfusion, and postoperative events. The accuracy of the database has also been confirmed. In brief, we compared all the relevant electronic data with the paper record in 100 randomly selected patients and found an error rate of less than 2%.<sup>16</sup> The type and dose of  $\beta$ -antagonists were recorded and for the most part reflects chronic longer term use.

**$\beta$ -Blocker Exposure.** Data on  $\beta$ -blocker exposure was defined primarily using two separate databases, the electronic preoperative assessment data, which is a surrogate for chronic use but does not include data for emergency surgery or inpatients transferred from other hospitals before elective surgery. Approximately 35% of all surgical patients have no data on preoperative  $\beta$ -blocker exposure. The inpatient pharmacy database shows all inpatient drug use but cannot distinguish

between acute and chronic use or those withdrawn from  $\beta$ -blockers. Previous work from our groups shows that approximately 30% of patients are started on  $\beta$ -blockers between the inpatient visit and surgery, whereas less than 10% are withdrawn from  $\beta$ -blockers, when the preoperative data are compared with the inpatient pharmacy database. Thus the current analysis is based on in-hospital exposure to  $\beta$ -blockers that is predominately chronic in nature. The  $\beta$ -blocker exposure in this analysis reflects data from the inpatient pharmacy database for each of the first six postoperative days, where the day of surgery is considered the day 1. To establish the consistency of the  $\beta$ -blocker dosage and type and dose, we compared the drug administered on the first 2 postoperative days to the rest of the 6 postoperative days and establish the  $\beta$ -blocker crossover rate, in each  $\beta$ -blocker exposed patient. Less than 1% (107 of 10,756) of all patients received different  $\beta$ -blockers between the first and last inpatient days. We included all of these patients in the analysis because this small number of patients was unlikely to influence the outcome. The drug exposure of interest was considered to be the first  $\beta$ -blocker administered in all cases.

### Outcome

The primary outcome was postoperative stroke within 7 days of surgery, and this definition was defined *a priori* because POISE trial showed the increase in the number of strokes in patients receiving metoprolol, compared with the control group occurred in this time frame.<sup>3</sup> Identification of patients with stroke was defined in a multiple step process. First, we surveyed the discharge abstract database of 10th version of the International Classification of Diseases-10 (ICD-10) codes for cerebral ischemia and stroke (appendix). We then cross-referenced these results with the medical imaging database for patients having computed tomography or magnetic resonance imaging of the brain within 7 days of surgery. After reviewing the medical and radiological reports of this cohort, two investigators (Drs. Judelman and Ashes) adjudicated the presence of postoperative strokes based on the presence of confirmatory clinical or radiological evidence. The stroke timing and adjudication occurred without knowledge of medication history or hematologic status. Finally, we surveyed all patients who died within 7 days of surgery to reduce the number of missed strokes in patients who died before diagnosis. All disagreements were resolved through consensus or involvement of a third reviewer (Dr. Beattie).

The secondary outcome was a composite comprising in-hospital death within 30 days of surgery, stroke, and postoperative myocardial injury, which was defined as a peak troponin I of greater than 0.7  $\mu\text{g/l}$ . Myocardial injury was assessed using troponin I, using the Dade Behring Dimension assay

(detection limit 0.07  $\mu\text{g/ml}$ ; Siemens Healthcare Diagnostics, Deerfield, IL). In May 2008, the institution changed to the Abbott Architect i2000 analyzer (Abbott Diagnostics, Abbott Park, IL). Internal correlation studies showed a 1-to-1 correlation to the Dade Behring assay and the change in assay method does not affect the interpretation of the results presented here.

### Statistical Analysis

We compared the demographic, surgical, comorbid, and pharmacologic characteristics of the patients taking the different  $\beta$ -blockers with patients who were not exposed to in-hospital  $\beta$ -blockers. We then assessed the unadjusted relationship between nadir hemoglobin<sup>††</sup> and postoperative stroke by constructing a restricted cubic spline curve for each of metoprolol, atenolol, and bisoprolol. Because the number of strokes limited the number of confounding variables that could be reliably entered into logistic regression analysis, the primary analysis consisted of a propensity score-matched pairs analysis comparing bisoprolol with the combination of metoprolol or atenolol. A propensity score estimating the probability of being exposed to bisoprolol was generated using a nonparsimonious multivariable logistic regression model that included all measured covariates.<sup>‡‡</sup> Individuals receiving bisoprolol were then matched to individuals receiving metoprolol or atenolol, on a 1-to-1 basis. In this analysis, two cohorts with similar characteristics were created using a 5 to >1 computerized greedy-matching algorithm. Covariate balance between the matched pairs was then evaluated using standardized difference. This process was repeated iteratively, blinded to the outcomes, until good covariate balance (standardized difference <10%, in every confounding variable) was achieved. We used conditional logistic regression to compare rates of the primary outcome and secondary outcome, in the matched pairs.

A second analysis was then conducted using multivariable logistic regression analysis. The candidate variables in this model included the predictors of stroke identified in the POISE trial and two potential predictors of stroke that were identified based on our animal experiments: a nadir hemoglobin under 9 gm/dl and  $\beta$ -blocker type. In this analysis,  $\beta$ -blockers type compared bisoprolol with the two agents, metoprolol or atenolol. Model calibration was evaluated by the Hosmer–Lemeshow test, whereas discrimination was assessed using the c-statistic. All analyses were performed using SAS 9.2 (SAS Institute, Cary, NC)

### Results

The final cohort consisted of 44,092 consecutive patients having in-hospital procedures. The details of the assembly of this cohort are presented in figure 1, whereas the characteristics of the study sample are presented in table 1. Eighty-eight patients (0.2%) experienced acute stroke within 7 days of surgery. Among patients with a Revised Cardiac Risk Index of 1 or more, the risk of stroke was 0.4%. The peak incidence of stroke was on the first postoperative day, and approximately two thirds of strokes occurring within 48 h of surgery

<sup>††</sup> Since there was no routine protocol for postoperative measurement of hemoglobin, nadir hemoglobin was defined as the lowest level in the first 3 days after surgery.

<sup>‡‡</sup> In the initial submission, our primary analysis used a logistic regression and the secondary analysis compared Bisoprolol to Metoprolol in a propensity matched cohort. The present analysis was suggested during the review process.



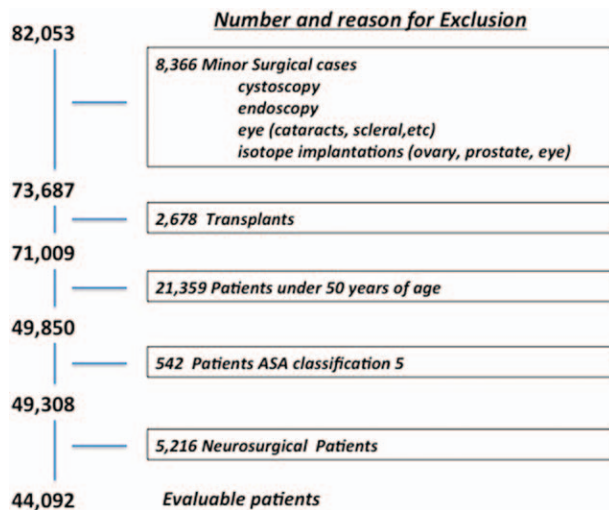

**Fig. 1.** Make up of the study population. Each step of this diagram depicts the number of exclusions and reasons for the exclusion, leading to the final population evaluated. ASA = American Society of Anesthesiologists.

(fig. 2). Of the 88 patients who suffered postoperative strokes, 17 (19.3%) died in hospital within 30 days of surgery. The median length-of-stay of the surviving stroke patients was 27 days (interquartile range 14–47), contrast to 4 days (interquartile range 2–8) for those patients who survived without having a stroke. Of the surviving stroke patients, 57 (80%) required long-term care, rehabilitation facilities, or some form of extra care on hospital discharge. In comparison, this proportion was 33% among surviving nonstroke patients.

Twenty-four percent ( $n = 10,756$ ) of the patients in this study sample were taking  $\beta$ -blockers during the hospital stay. The patient characteristics, including demographics and comorbidities, the median dosage and range of each of the  $\beta$ -blockers of interest, surgical details and transfusion requirements, and concomitant cardiovascular medications are seen in table 1. It is important to note that patients taking atenolol had fewer risk factors associated with stroke than patients receiving bisoprolol or metoprolol. Specifically, patients receiving atenolol had less cerebral vascular disease, chronic renal failure, and diabetes. The patients exposed to atenolol were being predominately treated for hypertension (57%).

The relationship between nadir hemoglobin and stroke is displayed in figure 3. There is a difference in the baseline risk of stroke between metoprolol and the other two agents. Second, there is a sharp increase in the incidence of stroke when hemoglobin levels decrease to below a level of 9 gm/dl.

The matched cohort consisted of 2,462 patients; half receiving bisoprolol and the remainder receiving either metoprolol or atenolol. The pairs were well matched for all variables. The mean standardized difference for the 50 known variables was  $-0.008$  and ranged from  $-0.098$  to  $0.045$  (table 2). In the matched cohort analysis, two patients taking bisoprolol and 10 patients taking less selective  $\beta$ -antagonists experienced postoperative stroke (odds ratio, 0.20; 95% CI, 0.04–0.91).

The components of the composite secondary outcomes showed less acute myocardial injury as judged by increased troponin after surgery, and no difference in mortality.

The result of the restricted logistic regression analysis comparing bisoprolol with atenolol and metoprolol is seen in table 3. Bisoprolol is associated with fewer postoperative strokes than the less selective  $\beta$ -blockers (0.20, 95% CI, 0.04–0.99). In addition, factors associated with cerebral hypoxia and stroke from earlier animal experiments and clinical studies were retained in the current study. Acute anemia was associated with stroke in a manner that was dependent on the magnitude of the decrease in hemoglobin concentration. The most significant predictor of stroke was a history of cerebral vascular disease. New onset of atrial fibrillation (AF), an important factor in POISE trial, was not significant in our analysis (odds ratio, 0.72; 95% CI, 0.1–5.3). This model has good discrimination (c-statistic, 0.788) and good calibration ( $P = 0.712$ ).

## Discussion

In this single-institution retrospective cohort study, postoperative stroke was a rare but devastating complication of major noncardiac surgery. The highly selective  $\beta_1$ -antagonist bisoprolol was associated with decreased stroke rate compared with the less  $\beta_1$ -selective agents metoprolol or atenolol. The increase in stroke rate observed was also associated with an increase in other severe adverse clinical outcomes suggesting that the impact of the less selective agents have broad clinical effects on patient outcomes. This analysis also demonstrates that there is an increase in adverse cardiac outcomes when  $\beta$ -blocked patients experience acute anemia (hemoglobin  $<9$  gm/dl).

Our results warrant comparison with the POISE trial<sup>3</sup> and our animal experiments<sup>9–12</sup>. Similar to the POISE trial, cerebral vascular disease was a major risk factor for postoperative stroke. A history of cerebral vascular disease or stroke is the most consistent predictor of postoperative stroke and has been seen in several recent large observational trials.<sup>17–19</sup> In addition, transfusion was associated with stroke in a dose-dependent manner, which has been previously demonstrated.<sup>20</sup> In that analysis, 4 units of transfusion were used to define major blood loss as compared with 2 units in POISE trial. Our analysis, which is composed of predominantly of patients with chronically administered  $\beta$ -antagonists, also demonstrates that metoprolol is associated with an increased incidence of postoperative stroke, as has recently been observed in two other retrospective cohort studies.<sup>21,22</sup> In those investigations, metoprolol was compared with atenolol, however, we find these two drugs were essentially equivalent in increasing the stroke rate compared with unexposed patients (analysis not shown). The differences between metoprolol and atenolol in those analyses<sup>5,22</sup> could result from confounding by indication as was discussed.<sup>21</sup> Our data supports this supposition given that, in our study, atenolol-exposed patients had much lower risk of stroke. The baseline risk factors for stroke in patients administered metoprolol and bisoprolol were similar limiting the risk of confounding by indication.

**Table 1.** Patient Characteristics *versus* Type of  $\beta$ -Blocker

|                                 | No $\beta$ -Antagonist<br>n = 33,285 | Metoprolol<br>n = 5,995 | Atenolol<br>n = 2,541 | Bisoprolol<br>n = 1,246 |
|---------------------------------|--------------------------------------|-------------------------|-----------------------|-------------------------|
| Dose (daily mg)                 |                                      | 100 (50–100) 400        | 50 (25–50) 100        | 5 (2.5–5) 15            |
| Age 65–75                       | 9,918 (29.1)                         | 2,088 (34.8)            | 922 (36.3)            | 406 (32.6)              |
| Age >75                         | 6,983 (20.5)                         | 2,358 (39.3)            | 849 (33.4)            | 478 (38.4)              |
| Sex (male)                      |                                      | 3,510 (58.6)            | 1,351 (53.2)          | 754 (60.5)              |
| Year of surgery                 |                                      |                         |                       |                         |
| 2003                            | 3,549 (8.1)                          | 770 (1.8)               | 326 (0.7)             | 44 (0.1)                |
| 2004                            | 3,738 (8.5)                          | 804 (1.8)               | 311 (0.7)             | 72 (0.2)                |
| 2005                            | 3,961 (9.0)                          | 864 (1.9)               | 334 (0.8)             | 107 (0.3)               |
| 2006                            | 4,136 (9.4)                          | 757 (1.7)               | 335 (0.8)             | 142 (0.3)               |
| 2007                            | 4,565 (10.4)                         | 755 (1.7)               | 338 (0.8)             | 239 (0.5)               |
| 2008                            | 4,476 (10.2)                         | 687 (1.6)               | 304 (0.7)             | 189 (0.4)               |
| 2009                            | 4,361 (9.9)                          | 655 (1.5)               | 304 (0.7)             | 209 (0.5)               |
| 2010                            | 4,499 (10.2)                         | 703 (1.6)               | 289 (0.6)             | 244 (0.6)               |
| Surgical type                   |                                      |                         |                       |                         |
| Ear, nose, throat               | 3,876 (80.1)                         | 440 (9.2)               | 266 (5.6)             | 111 (2.3)               |
| Urology                         | 9,408 (75.2)                         | 1,660 (13.3)            | 802 (6.4)             | 323 (2.6)               |
| Vascular                        | 1,330 (41.1)                         | 1,207 (37.6)            | 297 (9.3)             | 237 (7.4)               |
| Orthopedic                      | 2,345 (80.1)                         | 263 (9.1)               | 162 (5.6)             | 76 (2.6)                |
| General                         | 6,217 (75.9)                         | 1,136 (13.9)            | 432 (5.3)             | 211 (2.6)               |
| Thoracic                        | 3,297 (77.8)                         | 565 (13.3)              | 167 (3.9)             | 116 (2.7)               |
| Plastic                         | 1,438 (85.5)                         | 123 (7.3)               | 56 (3.3)              | 27 (1.6)                |
| Gynecology                      | 5,374 (81.5)                         | 601 (9.1)               | 359 (5.5)             | 145 (2.2)               |
| Emergent                        | 6,001 (17.6)                         | 1,938 (32.3)            | 477 (18.8)            | 250 (20.1)              |
| Duration (min)                  | 140 (119)                            | 151.7 (125)             | 145 (114)             | 153 (125)               |
| Comorbid states                 |                                      |                         |                       |                         |
| CAD                             | 534 (1.6)                            | 561 (9.4)               | 156 (6.1)             | 138 (11.1)              |
| CHF                             | 435 (1.3)                            | 365 (6.1)               | 74 (2.9)              | 99 (8.0)                |
| CVD                             | 800 (2.4)                            | 358 (6.0)               | 102 (4.0)             | 69 (5.5)                |
| Diabetes mellitus               | 907 (2.7)                            | 812 (13.5)              | 150 (5.9)             | 177 (14.2)              |
| CRF                             | 824 (2.4)                            | 570 (9.5)               | 107 (4.2)             | 96 (7.7)                |
| Anemia                          | 6,077 (17.8)                         | 1,980 (33.0)            | 603 (23.7)            | 334 (26.8)              |
| Cancer                          | 12,702 (37.3)                        | 1,862 (31.1)            | 878 (34.6)            | 452 (36.3)              |
| Metastatic cancer               | 4,600 (13.5)                         | 682 (11.4)              | 311 (12.2)            | 150 (12.0)              |
| Hypertension                    | 6,125 (17.9)                         | 2,298 (38.3)            | 1,402 (56.2)          | 489 (39.2)              |
| Coagulopathy                    | 540 (1.62)                           | 353 (5.9)               | 86 (3.4)              | 63 (5.1)                |
| Risk indices                    |                                      |                         |                       |                         |
| ASA class 2                     | 13,370 (40.2)                        | 754 (12.6)              | 618 (24.3)            | 161 (12.9)              |
| ASA class 3                     | 15,300 (46.0)                        | 2,486 (58.2)            | 1,536 (60.5)          | 739 (59.3)              |
| ASA class 4                     | 2,968 (8.9)                          | 1,733 (28.9)            | 378 (14.9)            | 341 (27.4)              |
| RCRI = 1                        | 7,293 (21.4)                         | 2,150 (35.9)            | 728 (28.7)            | 406 (32.6)              |
| RCRI = 2                        | 1,715 (5.0)                          | 1,536 (25.6)            | 388 (15.3)            | 339 (27.2)              |
| RCRI $\geq 3$                   | 362 (1.1)                            | 436 (7.3)               | 110 (4.3)             | 125 (10.3)              |
| Concomitant cardiac medications |                                      |                         |                       |                         |
| Statins                         | 5,189 (15.2)                         | 2,452 (40.9)            | 987 (38.8)            | 552 (44.3)              |
| CCBs                            | 4,000 (11.7)                         | 1,417 (23.6)            | 701 (27.6)            | 312 (25.0)              |
| ACE inhibitors                  | 4,689 (13.8)                         | 1,895 (31.6)            | 816 (32.1)            | 423 (33.9)              |
| Aspirin                         | 2,041 (6.1)                          | 1,561 (27.5)            | 474 (18.7)            | 319 (26.6)              |
| Hematology                      |                                      |                         |                       |                         |
| Preop hemoglobin                | 13.3 (1.8)                           | 12.6 (2.0)              | 13.0 (1.8)            | 12.9 (1.8)              |
| Postop hemoglobin               | 10.3 (1.8)                           | 9.9 (1.7)               | 10.3 (1.7)            | 10.2 (1.7)              |
| Nadir                           | 7,459 (21.9)                         | 2,180 (36.4)            | 686 (27.0)            | 366 (29.4)              |
| No transfusion                  | 32,019 (96.2)                        | 5,436 (90.6)            | 2,421 (95.3)          | 1,150 (92.3)            |
| 1–4 UE                          | 1,210 (3.6)                          | 538 (9.0)               | 118 (4.6)             | 92 (7.4)                |
| More than four UE               | 66 (0.4)                             | 21 (0.4)                | 2 (0.3)               | 2 (0.5)                 |

(continued)

Table 1. (Continued)

|                              | No $\beta$ -Antagonist<br>n = 33,285 | Metoprolol<br>n = 5,995 | Atenolol<br>n = 2,541 | Bisoprolol<br>n = 1,246 |
|------------------------------|--------------------------------------|-------------------------|-----------------------|-------------------------|
| Postoperative disposition    |                                      |                         |                       |                         |
| PACU                         | 32,395 (97.3)                        | 5,571 (92.3)            | 2,465 (97.0)          | 1,187 (95.3)            |
| New AF                       | 114 (0.3)                            | 207 (0.5)               | 18 (0.1)              | 13 (0.03)               |
| In-hospital 30-day mortality | 430 (1.26)                           | 199 (3.32)              | 34 (1.34)             | 25 (2.01)               |
| Stroke (7 days)              | 40 (0.1)                             | 37 (0.62)               | 9 (0.35)              | 2 (0.16)                |
| Composite outcome            | 733 (2.15)                           | 713 (11.9)              | 103 (4.01)            | 77 (6.2)                |

Two hundred ten patients with other  $\beta$ -antagonists (sotalol, carvedilol, nadolol, and labetalol) are not displayed. There were no strokes in these patients. Daily dosages are on hospital admission and from the Preoperative Assessment and are expressed in milligram. The doses are expressed as median (25th to 75th percentile) and maximum dose. The median dose found in this analysis, metoprolol, atenolol, and bisoprolol is the recommended daily dose for both angina and hypertension. Three percent of the metoprolol population was taking the succinate formulation, however, the daily doses are equal. The composite outcome is defined as any or all of stroke within 7 days of surgery, postoperative myocardial injury (troponin I increase  $>0.7 \mu\text{g/l}$ ), and in-hospital death within 30 days of surgery.

ACE = angiotensin-converting enzyme; AF = atrial fibrillation; Anemia = the World Health organization definition adjusted for sex; ASA class = the American Society of Anesthesiologists' classification; CAD = coronary artery disease; CCBs = calcium channel blockers; CHF = congestive heart failure; CRF = chronic renal failure; CVD = cerebral vascular disease; Nadir = the number and percent of patients with the lowest postop hemoglobin  $<9.0 \text{ mg/dl}$ ; PACU = postanesthesia care unit; RCRI = revised cardiac risk index; UE = units of erythrocytes transfused.

These findings that bisoprolol may be a safer alternative in  $\beta$ -blocked patients clearly warrants further investigation in a controlled clinical trial.

Our experimental findings suggested that the risk of stroke associated with less selective agents results from inhibition of  $\beta_2$ -mediated cerebral vasodilation. Animal studies show that all the  $\beta$ -blockers evaluated would be expected to have a comparable effect on limiting the cardiac output responsiveness through comparable antagonism of  $\beta_1$ -receptors.<sup>9-12</sup> The compensatory increase in cardiac output becomes predominantly heart rate dependent at a hemoglobin level between 9 and 10 gm/dl.<sup>6</sup> Below this hemoglobin level, all of the  $\beta$ -blockers that we studied were associated with increasing stroke rates (fig. 3). However, as previously described, the impact of  $\beta_2$ -inhibition by less selective  $\beta$ -blockers may impair cerebral vasodilation independent of hemoglobin level; possibly explaining the difference

seen between metoprolol and bisoprolol at nadir hemoglobin levels greater than 9 gm/dl (fig. 3) because nonselective  $\beta$ -blockers may impair cerebral vasodilation ( $\beta_2$ -mediated effect) across all levels of blood loss. Our animal data support this argument by demonstrating that metoprolol increased systemic vascular resistance and reduced brain tissue  $\text{Po}_2$  *in vivo*, at normal hemoglobin levels.<sup>10</sup> In addition, metoprolol

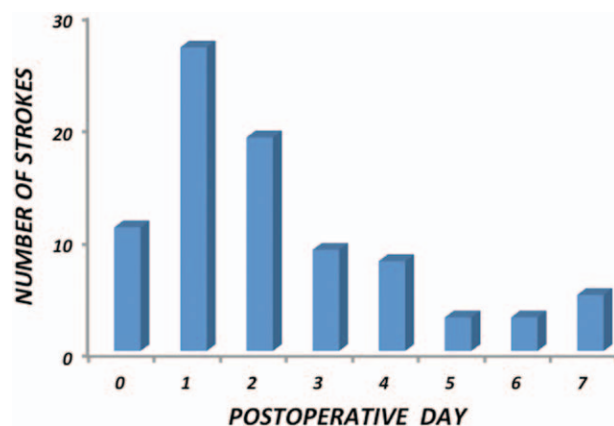

Fig. 2. The temporal relationship between surgery and postoperative stroke. The peak incidence of stroke was seen on the first postoperative day. Day 0 depicts the day of surgery. The peak incidence is on the day after surgery, whereas two thirds of the strokes occur within the first 72 h.

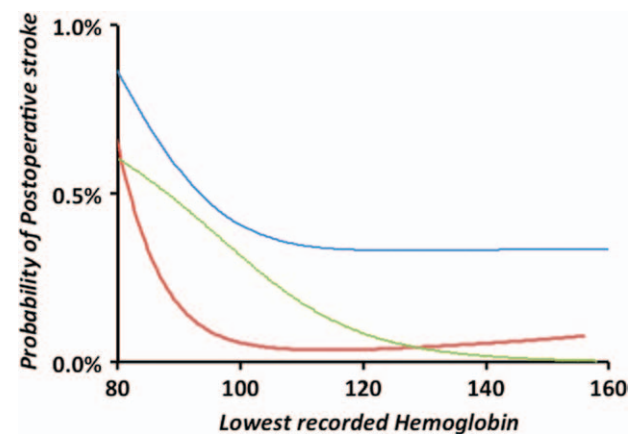

Fig. 3. Comparison of the effect of lowest recorded hemoglobin on postoperative stroke. The figure illustrates the restricted cubic spline relationship between nadir hemoglobin (defined as the lowest recorded hemoglobin in the first 72 h after surgery) and the probability of postoperative stroke. The relationship is shown for the three most common  $\beta$ -adrenergic antagonists in this population. Metoprolol ( $\beta_1/\beta_2 = 2.3$ ) is shown in blue; atenolol ( $\beta_1/\beta_2 = 4.7$ ) is shown in green, and bisoprolol ( $\beta_1/\beta_2 = 13.5$ ) is shown in red. The relationship shows that metoprolol has a higher baseline risk of stroke, whereas atenolol has a baseline stroke risk similar to bisoprolol. The risk of stroke increases for all  $\beta$ -blockers at a postoperative hemoglobin level of 9 gm/dl. A spline curve refers to a smoothing process. The process involves a third-order polynomial function that in this case presents the probability of stroke for the level of nadir hemoglobin.

**Table 2.** Patient Characteristics before and after Propensity Score Matching: An Analysis Comparing Highly Selective  $\beta$ -Blockade (Bisoprolol) to Less Selective Agents (Atenolol and Metoprolol)

|                            | Unadjusted              |                     |                            | After Propensity Score Matching |                                        |                            |
|----------------------------|-------------------------|---------------------|----------------------------|---------------------------------|----------------------------------------|----------------------------|
|                            | Bisoprolol<br>n = 1,246 | Others<br>n = 9,550 | Standardized<br>Difference | Bisoprolol<br>n = 1,231         | Atenolol or<br>Metoprolol<br>n = 1,231 | Standardized<br>Difference |
| <b>Demographics</b>        |                         |                     |                            |                                 |                                        |                            |
| Sex (male)                 | 754 (60.5)              | 5,458 (57.1)        | 0.07                       | 744 (30.2)                      | 723 (29.4)                             | 0.000                      |
| Age (years)                | 70.9 (10)               | 70.6 (9.5)          | 0.031                      | 70.6 $\pm$ 9.5                  | 69.9 $\pm$ 9.9                         | -0.002                     |
| <b>Year of surgery</b>     |                         |                     |                            |                                 |                                        |                            |
| 2003                       | 44 (0.3)                | 1,220 (12.8)        | 0.429                      | 44 (2.0)                        | 48 (1.8)                               | 0.015                      |
| 2004                       | 72 (5.8)                | 1,231 (12.9)        | -0.246                     | 72 (2.6)                        | 63 (2.9)                               | -0.018                     |
| 2005                       | 107 (7.5)               | 1,317 (13.8)        | -0.205                     | 107 (4.4)                       | 107 (4.4)                              | 0.000                      |
| 2006                       | 142 (12.0)              | 1,207 (12.6)        | -0.018                     | 142 (5.8)                       | 170 (6.9)                              | 0.045                      |
| 2007                       | 239 (14.6)              | 1,230 (12.9)        | 0.101                      | 239 (9.8)                       | 172 (7.0)                              | -0.098                     |
| 2008                       | 189 (15.4)              | 1,103 (11.5)        | 0.144                      | 189 (7.7)                       | 203 (8.3)                              | 0.022                      |
| 2009                       | 209 (16.0)              | 1,100 (11.5)        | 0.131                      | 203 (8.3)                       | 215 (8.7)                              | 0.014                      |
| 2010                       | 244 (19.6)              | 1,153 (12.1)        | 0.206                      | 235 (9.6)                       | 253 (10.3)                             | 0.023                      |
| <b>Surgical type</b>       |                         |                     |                            |                                 |                                        |                            |
| Ear, nose,<br>throat       | 111 (8.4)               | 805 (8.4)           | 0                          | 108 (4.4)                       | 107 (4.4)                              | -0.003                     |
| Urology                    | 323 (26)                | 2,784 (29)          | -0.067                     | 321 (26)                        | 318 (25.8)                             | -0.005                     |
| Vascular                   | 237 (19)                | 1,639 (17)          | 0.05                       | 233 (19.0)                      | 238 (19.2)                             | 0.005                      |
| Orthopedic                 | 76 (6.1)                | 472 (5)             | 0.048                      | 75 (6.2)                        | 74 (6.1)                               | 0.004                      |
| General                    | 211 (18)                | 1,759 (18)          | 0                          | 209 (17.0)                      | 207 (16.9)                             | 0.003                      |
| Thoracic                   | 116 (9)                 | 817 (9)             | 0                          | 115 (9.4)                       | 114 (9.3)                              | 0.003                      |
| Plastic                    | 27 (2)                  | 216 (2)             | 0                          | 27 (1.1)                        | 25 (1.0)                               | -0.005                     |
| Gynecology                 | 145 (12)                | 1,026 (11)          | 0.031                      | 145 (5.9)                       | 146 (5.9)                              | 0.003                      |
| Duration (min)             | 153 (119)               | 148 (119)           | 0.042                      | 152 $\pm$ 124                   | 154 $\pm$ 127                          | 0.066                      |
| Emergent<br>surgery        | 250 (20.1)              | 2,415 (25.4)        | -0.127                     | 246 (20.0)                      | 246 (20.0)                             | 0.000                      |
| <b>Comorbidities</b>       |                         |                     |                            |                                 |                                        |                            |
| CAD                        | 138 (11.0)              | 799 (8.4)           | 0.088                      | 133 (10.8)                      | 134 (10.85)                            | -0.003                     |
| CVD                        | 69 (5.5)                | 515 (5.4)           | 0.04                       | 68 (2.8)                        | 67 (2.8)                               | 0.000                      |
| CHF                        | 99 (8.0)                | 531 (5.6)           | 0.095                      | 89 (3.6)                        | 105 (3.9)                              | -0.016                     |
| Diabetes<br>mellitus       | 177 (14.2)              | 1,075 (11.2)        | 0.091                      | 173 (7.0)                       | 180 (7.3)                              | -0.012                     |
| CRF                        | 76 (6.1)                | 641 (6.7)           | -0.025                     | 73 (5.9)                        | 82 (6.6)                               | -0.029                     |
| Anemia                     | 334 (26.8)              | 2,865 (30.0)        | -0.071                     | 330 (13.4)                      | 344 (14.0)                             | -0.017                     |
| COPD                       | 115 (9.2)               | 591 (6.2)           | 0.016                      | 102 (4.1)                       | 105 (4.4)                              | -0.014                     |
| Metastatic                 | 150 (12.0)              | 1,095 (11.5)        | 0.113                      | 149 (6.1)                       | 153 (6.2)                              | -0.004                     |
| Hypertension               | 489 (39.2)              | 3,700 (44.0)        | -0.097                     | 484 (35.7)                      | 484 (35.7)                             | 0.000                      |
| Coagulopathy               | 63 (5.1)                | 520 (5.4)           | -0.013                     | 60 (2.4)                        | 65 (2.6)                               | -0.013                     |
| <b>Risk indices</b>        |                         |                     |                            |                                 |                                        |                            |
| ASA class 2                | 161 (1.5)               | 1,561 (14.4)        | -0.491                     | 173 (14.1)                      | 160 (13.0)                             | -0.011                     |
| ASA class 3                | 739 (59.4)              | 5,599 (58.6)        | 0.016                      | 716 (58.2)                      | 734 (59.3)                             | 0.002                      |
| ASA class 4                | 341 (27.4)              | 2,363 (24.7)        | 0.062                      | 339 (27.6)                      | 332 (27.0)                             | 0.006                      |
| RCRI = 1                   | 406 (32.6)              | 3,199 (33.5)        | -0.019                     | 404 (16.4)                      | 424 (17.2)                             | 0.008                      |
| RCRI = 2                   | 214 (17.2)              | 1,492 (15.6)        | 0.043                      | 210 (8.5)                       | 212 (8.6)                              | 0.002                      |
| RCRI $\geq$ 3              | 125 (10.0)              | 621 (6.5)           | 0.127                      | 116 (4.7)                       | 122 (5.0)                              | -0.011                     |
| <b>Hematologic factors</b> |                         |                     |                            |                                 |                                        |                            |
| Preop<br>hemoglobin        | 12.9 (1.8)              | 12.8 (1.9)          | 0.052                      | 12.9 (1.9)                      | 12.8 (2.0)                             | 0.050                      |
| Postop<br>hemoglobin       | 10.2 (1.6)              | 10.0 (1.7)          | 0.12                       | 10.2 (1.7)                      | 10.1 (1.7)                             | 0.057                      |
| Nadir                      | 29.3                    | 28.8                | 0.011                      | 389 (15.2)                      | 372 (14.5)                             | 0.019                      |

(continued)



Table 2. (Continued)

|                                                                    | Unadjusted              |                     |                            | After Propensity Score Matching |                                        |                            |
|--------------------------------------------------------------------|-------------------------|---------------------|----------------------------|---------------------------------|----------------------------------------|----------------------------|
|                                                                    | Bisoprolol<br>n = 1,246 | Others<br>n = 9,550 | Standardized<br>Difference | Bisoprolol<br>n = 1,231         | Atenolol or<br>Metoprolol<br>n = 1,231 | Standardized<br>Difference |
| No transfusion                                                     | 1,089 (87)              | 8,162 (85)          | -0.058                     | 1,077 (87.6)                    | 1,051 (85.4)                           | 0.058                      |
| 1–4 UE                                                             | 135 (11)                | 1,124 (13)          | -0.33                      | 132 (10.8)                      | 141 (11.4)                             | -0.003                     |
| More than<br>four UE                                               | 36 (2)                  | 275 (2)             | 0.049                      | 22 (1.6)                        | 39 (3.2)                               | -0.008                     |
| Chronically administered medications                               |                         |                     |                            |                                 |                                        |                            |
| Statins                                                            | 552 (44.3)              | 3,802 (40.0)        | 0.87                       | 545 (44.2)                      | 543 (44.2)                             | 0.003                      |
| Aspirin                                                            | 319 (25.6)              | 2,304 (24.1)        | 0.035                      | 313 (12.7)                      | 317 (12.9)                             | -0.009                     |
| CCBs                                                               | 312 (25.0)              | 2,357 (24.7)        | 0.007                      | 311 (25.2)                      | 294 (23.8)                             | 0.003                      |
| ACE inhibitor                                                      | 423 (33.9)              | 2,711 (31.8)        | 0.032                      | 422 (31.7)                      | 422 (31.7)                             | 0.000                      |
| Postoperative events                                               |                         |                     |                            |                                 |                                        |                            |
| PACU                                                               | 1,187 (95.5)            | 9,000 (94.3)        | 0.055                      | 1,173 (95.3)                    | 1,160 (94.2)                           | 0.046                      |
| New AF                                                             | 11 (0.5)                | 253 (2.6)           | -0.171                     | 11 (0.5)                        | 6 (0.3)                                | 0.032                      |
| Primary outcome                                                    |                         |                     |                            |                                 |                                        |                            |
| Stroke                                                             | 2 (0.01)                | 49 (0.5)            |                            | 2 (0.01)                        | 10 (0.1)                               |                            |
| Secondary outcomes                                                 |                         |                     |                            |                                 |                                        |                            |
| POM.I                                                              | 68 (5.5)                | 686 (7.2)           |                            | 65 (5.3)                        | 105 (8.5)                              |                            |
| In-hospital<br>mortality                                           | 25 (2.0)                | 265 (2.8)           |                            | 25 (2.0)                        | 31 (2.5)                               |                            |
| Comp out.                                                          | 77 (6.2)                | 890 (9.3)           |                            | 74 (6.0)                        | 133 (10.8)                             |                            |
| Relative risk of stroke (bisoprolol vs. metoprolol or atenolol)    |                         |                     |                            |                                 | 0.20 (95% CI, 0.04–0.91)               |                            |
| Relative risk of composite (bisoprolol vs. metoprolol or atenolol) |                         |                     |                            |                                 | 0.56 (95% CI, 0.42–0.73)               |                            |

ACE = angiotensin-converting enzyme; Anemia = the World Health organization definition adjusted for sex; ASA Class = the American Society of Anesthesiologists' classification; CAD = coronary artery disease; CCB = calcium channel blockers; CHF = congestive heart failure; Comp out. = the composite outcome defined as any or all of postoperative stroke, postoperative myocardial injury (troponin >0.07 µg/ml) and in-hospital 30-day mortality; COPD = chronic obstructive pulmonary disease; CRF = chronic renal failure; CVD = cerebral vascular disease; New AF = the new onset of postoperative atrial fibrillation; Nadir = the number and percentage of patient with a postoperative hemoglobin <9 gm/dl; PACU = postanesthesia care unit; Preop hemoglobin = the hemoglobin levels before surgery in gm/dl; POMI = postoperative myocardial injury; Postop hemoglobin = the lowest hemoglobin level postoperatively in gm/dl; RCRI = revised cardiac risk index; UE = units of erythrocytes transfused.

clearly impaired  $\beta_2$ -adrenergic vasodilation of cerebral arteries *in vitro*.<sup>10</sup> Finally, systemic  $\beta$ -blockers administered to anemic animals, at doses that can interact with  $\beta_2$  receptors, showed acute reduction in brain tissue  $P_{O_2}$  and increased expression of biological markers of cerebral hypoxia.<sup>8–10</sup>

Kamel *et al.* first noted an association between acute anemia and postoperative strokes. Using the National Surgical Quality Improvement Project database, they found that transfusion of more than 4 units doubled the stroke rate. Two additional, and independent, studies document that the interaction between  $\beta$ -blockade and acute surgical anemia is associated with an increased risk of postoperative coronary morbidity and multiorgan failure.<sup>5,23</sup> Because selective  $\beta_1$ -antagonists preserve peripheral circulation, it follows that highly cardioselective agents favor vital organ perfusion during conditions of acute blood loss and fluid resuscitation. This is a possible explanation for the finding that chronically administered metoprolol was associated with a greater risk of death after surgery compared with more selective  $\beta$ -antagonists.<sup>24</sup>

The overall stroke rate in the current study was 0.2%. In comparison, in studies where the National Surgical Quality Improvement Project database was used to study acute

postoperative stroke, a range of stroke incidence from 0.1 to 0.4% was observed. Although our incidence of stroke falls within this range, it is difficult to explain a four-fold variation in stroke rate, in studies using the National Surgical Quality Improvement Project database but may be due to different study populations. In the subgroup analysis of our sample, patients with at least one cardiac risk factor had an incidence of 0.4%, doubling the overall stroke incidence.

Previous studies have identified numerous risk factors for perioperative stroke which have included age, sex, AF, congestive heart failure, renal disease and cardiovascular disease,<sup>17</sup> chronic obstructive pulmonary disease, left ventricular systolic dysfunction, duration of surgery, and hyperglycemia. Our study did not have the sample size or the power to assess these factors. However, they are unlikely to influence our results because they were well matched in our propensity score. Studies that identified these variables had on average more than 1,000 outcomes and more than 250,000 subjects.

$\beta$ -Antagonism is known to decrease postoperative AF as demonstrated by the POISE study. Paradoxically, metoprolol doubled the stroke rate in POISE trial. These divergent data suggest that the postoperative strokes associated with



**Table 3.** The Association between of  $\beta_1$ -Selective Blockade and Stroke: Candidate Variables Based on POISE and Animal Experiments

|                                                             | Odds Ratio (95% CI) |
|-------------------------------------------------------------|---------------------|
| Cerebral vascular disease                                   | 6.13 (3.5–10.9)     |
| Bisoprolol (compared with atenolol or metoprolol)           | 0.20 (0.04–0.99)    |
| Atenolol or metoprolol (compared with no $\beta$ -exposure) | 5.14 (2.0–13.5)     |
| Emergent surgery                                            | 2.47 (1.5–4.0)      |
| Transfusion (per unit of erythrocyte)                       | 1.1 (1.03–1.2)      |
| Postoperative hemoglobin                                    | 0.975 (0.96–0.98)   |
| New onset of postoperative atrial fibrillation              | 0.72 (0.1–5.3)      |

c-Statistic = 0.774; Hosmer-Lemeshow,  $P$  = 0.318. Candidate variables from POISE trial<sup>3</sup>: (1) cerebral vascular disease (or Rx for TIA), (2) major blood loss, and (3) new onset of atrial fibrillation. Note that the definition of major blood loss was dichotomous (two or more units of erythrocytes in POISE trial, the current analysis uses transfusion as continuous variable). Candidate variables from animal experiments<sup>9–12</sup>: (1)  $\beta_1$ -selective agent vs. less selective, (2) acute anemia. Note that we defined anemia as a continuous variable based on increasing hemoglobin levels.

POISE = Perioperative Ischemia Evaluation; Rx = therapy; TIA = transient ischemic attack.

$\beta$ -blockade are unlikely to be related to new onset AF. Furthermore, the incidence of new onset postoperative AF in our study was comparable with POISE trial. However, we did not find that AF was associated with stroke. The potential explanations for this include: (1) AF may have been underestimated or AF may not have been coded properly in the discharge abstract database if it was of short duration or did not require special therapy; (2) previous associations between AF and postoperative stroke were derived on the basis of a history of preoperative AF,<sup>18,19</sup> which is distinct from our study and POISE trial, which found that new onset of AF was associated with postoperative stroke; (3) the American Heart Association guidelines for the management of AF suggest the use of  $\beta$ -blocker alone or in combination with other drugs.<sup>25</sup> This guideline may have contributed to the previous associations between AF and stroke because over 60% of patients with new onset AF reportedly receive metoprolol.<sup>26</sup> Unfortunately, studies finding that preoperative AF was associated with postoperative stroke did not record details of  $\beta$ -blockers use and they did not adjust for the influence of other chronic medication. Thus, the degree to which previous  $\beta$ -adrenergic antagonism confounds these results remains unknown because no difference in AF prophylactic effects were identified when different  $\beta$ -antagonists were prescribed.<sup>27</sup>

## Limitations

The retrospective observational nature of this study can be influenced by potential unmeasured confounders and the

two factors,  $\beta$ -adrenergic antagonism and acute anemia may identify patients who are “sicker,” having procedures with increased complexity. Nonetheless, using a propensity score-matched cohort, we were able to balance all known confounders and show a reduction in the stroke rate with highly selective  $\beta_1$ -antagonism. Cautious interpretation is also warranted because there were less than 90 strokes, rendering the results statistically fragile. However, the odds ratios found by our targeted logistic regression and propensity-matched cohorts are similar. In our opinion, our results are strengthened by the fact that two methods of risk adjustment, using different assumptions, yield similar results.

The use of International Classification of Diseases-10 coding to identify postoperative stroke may have introduced some errors, as other neurological pathology is included in the acute stroke coding.<sup>28,29</sup> The strokes we have identified in this analysis were independently verified by two observers, blinded to  $\beta$ -blocker exposure, using both clinical and radiological evidence. We are unable to comment on the clinically important incidence of perioperative hypotension<sup>3,30</sup> because intraoperative hemodynamic data on all patients were not available. Acute anemia is strongly associated with hypotension. The Transfusion Trigger Trial for Functional Hip Fracture Repair trial showed that a transfusion trigger of 8 gm/dl was associated with a three-fold increase in serious hypotension, tachycardia, and congestive failure compared with the cohort with a higher transfusion trigger.<sup>31</sup>

We cannot be sure that we have accurately defined all  $\beta$ -blocker exposures; in urgent and emergent procedures data are based solely on inpatient pharmacy data. This limits us because there is the potential to label a patient who had  $\beta$ -blockers withdrawn, as not being exposed or alternatively drug newly started, as a result of some event, could be labeled as chronic use. Both of these scenarios carry different risks.<sup>32</sup> Finally, the use of bisoprolol increased substantially over the period of our study. Although we have balanced the number of patients by year in the propensity analysis, we cannot adjust for other factors that may have influenced the decision to use bisoprolol over this time period.

## Conclusions

Postoperative stroke is a rare but devastating event that is associated with the use of the nonselective  $\beta$ -blockers and acute anemia. The analysis further identifies two potentially modifiable risk factors, the type of  $\beta$ -blocker and anemia. Consideration of these factors in the management of at-risk patients may alter the safety profile of perioperative  $\beta$ -adrenergic antagonism which offers irrefutable perioperative cardioprotection. All studies to date show that patients with significant cerebral vascular disease are at risk of stroke and treatment with  $\beta$ -antagonists, of any kind, should be carefully considered. Patients needing  $\beta$ -antagonist-mediated cardioprotection during surgery may benefit from the use of highly selective  $\beta_1$ -agents. We are in the process evaluating these findings prospectively.

## References

- Mangano DT, Layug EL, Wallace A, Tateo I: Effect of atenolol on mortality and cardiovascular morbidity after noncardiac surgery. Multicenter Study of Perioperative Ischemia Research Group. *N Engl J Med* 1996; 335:1713–20
- Poldermans D, Boersma E, Bax JJ, Thomson IR, van de Ven LL, Blankensteijn JD, Baars HF, Yo TI, Trocino G, Vigna C, Roelandt JR, van Urk H: The effect of bisoprolol on perioperative mortality and myocardial infarction in high-risk patients undergoing vascular surgery. Dutch Echocardiographic Cardiac Risk Evaluation Applying Stress Echocardiography Study Group. *N Engl J Med* 1999; 341:1789–94
- Devereaux PJ, Yang H, Yusuf S, Guyatt G, Leslie K, Villar JC, Xavier D, Chrolavicius S, Greenspan L, Pogue J, Pais P, Liu L, Xu S, Malaga G, Avezum A, Chan M, Montori VM, Jacka M, Choi P: Effects of extended-release metoprolol succinate in patients undergoing non-cardiac surgery (POISE trial): A randomised controlled trial. *Lancet* 2008; 371:1839–47
- Bangalore S, Wetterslev J, Pranesh S, Sawhney S, Gluud C, Messerli FH: Perioperative beta blockers in patients having non-cardiac surgery: A meta-analysis. *Lancet* 2008; 372:1962–76
- Beattie WS, Wijeyesundera DN, Karkouti K, McCluskey S, Tait G, Mitsakakis N, Hare GM: Acute surgical anemia influences the cardioprotective effects of beta-blockade: A single-center, propensity-matched cohort study. *ANESTHESIOLOGY* 2010; 112:25–3
- Weiskopf RB, Viele MK, Feiner J, Kelley S, Lieberman J, Noorani M, Leung JM, Fisher DM, Murray WR, Toy P, Moore MA: Human cardiovascular and metabolic response to acute, severe isovolemic anemia. *JAMA* 1998; 279:217–21
- Hare GM, Tsui AK, McLaren AT, Ragoonanan TE, Yu J, Mazer CD: Anemia and cerebral outcomes: Many questions, fewer answers. *Anesth Analg* 2008; 107:1356–70
- Shander A, Javidroozi M, Ozawa S, Hare GM: What is really dangerous: Anaemia or transfusion? *Br J Anaesth* 2011; 107(suppl 1):i41–59
- Ragoonanan TE, Beattie WS, Mazer CD, Tsui AK, Leong-Poi H, Wilson DF, Tait G, Yu J, Liu E, Noronha M, Dattani ND, Mitsakakis N, Hare GM: Metoprolol reduces cerebral tissue oxygen tension after acute hemodilution in rats. *ANESTHESIOLOGY* 2009; 111:988–1000
- El Beheiry MH, Heximer SP, Voigtlaender-Bolz J, Mazer CD, Connelly KA, Wilson DF, Beattie WS, Tsui AK, Zhang H, Golam K, Hu T, Liu E, Lidington D, Bolz SS, Hare GM: Metoprolol impairs resistance artery function in mice. *J Appl Physiol* 2011; 111:1125–33
- Hare GM, Worrall JM, Baker AJ, Liu E, Sikich N, Mazer CD: Beta2 adrenergic antagonist inhibits cerebral cortical oxygen delivery after severe haemodilution in rats. *Br J Anaesth* 2006; 97:617–23
- Hu T, Beattie WS, Mazer CD, Leong-Poi H, Fujii H, Wilson DF, Tsui AK, Liu E, Muhammad M, Baker AJ, Hare GM: Treatment with a highly selective  $\beta_1$  antagonist causes dose-dependent impairment of cerebral perfusion after hemodilution in rats. *Anesth Analg* 2013; 116:649–62
- Badgett RG, Lawrence VA, Cohn SL: Variations in pharmacology of beta-blockers may contribute to heterogeneous results in trials of perioperative beta-blockade. *ANESTHESIOLOGY* 2010; 113:585–92
- Baker JG: The selectivity of beta-adrenoceptor antagonists at the human beta1, beta2 and beta3 adrenoceptors. *Br J Pharmacol* 2005; 144:317–22
- Baker JG: The selectivity of beta-adrenoceptor agonists at human beta1-, beta2- and beta3-adrenoceptors. *Br J Pharmacol* 2010; 160:1048–61
- Grewal K, Wijeyesundera DN, Carroll J, Tait G, Beattie WS: Gender differences in mortality following non-cardiovascular surgery: An observational study. *Can J Anaesth* 2012; 59:255–62
- Bateman BT, Schumacher HC, Wang S, Shaefi S, Berman MF: Perioperative acute ischemic stroke in noncardiac and nonvascular surgery: Incidence, risk factors, and outcomes. *ANESTHESIOLOGY* 2009; 110:231–8
- Mashour GA, Shanks AM, Kheterpal S: Perioperative stroke and associated mortality after noncardiac, nonneurologic surgery. *ANESTHESIOLOGY* 2011; 114:1289–96
- Selim M: Perioperative stroke. *N Engl J Med* 2007; 356:706–13
- Kamel H, Johnston SC, Kirkham JC, Turner CG, Kizer JR, Devereux RB, Iadecola C: Association between major perioperative hemorrhage and stroke or Q-wave myocardial infarction. *Circulation* 2012; 126:207–12
- London MJ, Hur K, Schwartz GG, Henderson WG: Association of perioperative  $\beta$ -blockade with mortality and cardiovascular morbidity following major noncardiac surgery. *JAMA* 2013; 309:1704–13
- Mashour GA, Sharifpour M, Freundlich RE, Tremper KK, Shanks A, Nallamothu BK, Vlisides PE, Weightman A, Matlen L, Merte J, Kheterpal S: Perioperative metoprolol and risk of stroke after noncardiac surgery. *ANESTHESIOLOGY* 2013; 119 [Epub ahead of print]
- Le Manach Y, Collins GS, Ibanez C, Goarin JP, Coriat P, Gaudric J, Riou B, Landais P: Impact of perioperative bleeding on the protective effect of  $\beta$ -blockers during infrarenal aortic reconstruction. *ANESTHESIOLOGY* 2012; 117:1203–11
- Redelmeier D, Scales D, Kopp A: Beta blockers for elective surgery in elderly patients: Population based, retrospective cohort study. *BMJ* 2005; 331:932
- Fuster V, Rydén LE, Cannom DS, Crijns HJ, Curtis AB, Ellenbogen KA, Halperin JL, Kay GN, Le Huez JY, Lowe JE, Olsson SB, Prystowsky EN, Tamargo JL, Wann LS: 2011 ACCF/AHA/HRS focused updates incorporated into the ACC/AHA/ESC 2006 Guidelines for the management of patients with atrial fibrillation: A report of the American College of Cardiology Foundation/American Heart Association Task Force on Practice Guidelines developed in partnership with the European Society of Cardiology and in collaboration with the European Heart Rhythm Association and the Heart Rhythm Society. *J Am Coll Cardiol* 2011; 57:e101–98
- Scheuermeyer FX, Grafstein E, Stenstrom R, Christenson J, Heslop C, Heilbron B, McGrath L, Innes G: Safety and efficiency of calcium channel blockers *versus* beta-blockers for rate control in patients with atrial fibrillation and no acute underlying medical illness. *Acad Emerg Med* 2013; 20:222–30
- Khan MF, Wendel CS, Movahed MR: Prevention of post-coronary artery bypass grafting (CABG) atrial fibrillation: Efficacy of prophylactic beta-blockers in the modern era: A meta-analysis of latest randomized controlled trials. *Ann Noninvasive Electrocardiol* 2013; 18:58–8
- Tirschwell DL, Longstreth WT Jr: Validating administrative data in stroke research. *Stroke* 2002; 33:2465–70
- Kokotailo RA, Hill MD: Coding of stroke and stroke risk factors using international classification of diseases, revisions 9 and 10. *Stroke* 2005; 36:1776–81
- Bijker JB, Persoon S, Peelen LM, Moons KG, Kalkman CJ, Kappelle LJ, van Klei WA: Intraoperative hypotension and perioperative ischemic stroke after general surgery: A nested case-control study. *ANESTHESIOLOGY* 2012; 116:658–64
- Carson JL, Terrin ML, Noveck H, Sanders DW, Chaitman BR, Rhoads GG, Nemo G, Dragert K, Beaupre L, Hildebrand K, Macaulay W, Lewis C, Cook DR, Dobbin G, Zakriya KJ, Apple FS, Horney RA, Magaziner J; FOCUS Investigators: Liberal or restrictive transfusion in high-risk patients after hip surgery. *N Engl J Med* 2011; 365:2453–62
- Ellenberger C, Tait G, Beattie WS: Chronic  $\beta$  blockade is associated with a better outcome after elective noncardiac surgery than acute  $\beta$  blockade: A single-center propensity-matched cohort study. *ANESTHESIOLOGY* 2011; 114:817–23

## Appendix. ICD 10 Codes

### ICD 10 code used in determining preoperative RCRI

|                                                    |                                                                                                                                                                                                                                                                                                                                                                                                                                                                                                                                                             |
|----------------------------------------------------|-------------------------------------------------------------------------------------------------------------------------------------------------------------------------------------------------------------------------------------------------------------------------------------------------------------------------------------------------------------------------------------------------------------------------------------------------------------------------------------------------------------------------------------------------------------|
| Comorbidity                                        | ICD 10 code                                                                                                                                                                                                                                                                                                                                                                                                                                                                                                                                                 |
| CHF                                                | I42.6,I42.7, I43.8, I42.9, I50.0, I42.0, I42.4, I50.9, I50.1, I42.1, I42.8, I42.2,I42.5, J81. I11.0, I13.0, I13.2                                                                                                                                                                                                                                                                                                                                                                                                                                           |
| Cardiac ischemia                                   | I24.9,I21.9, I21.4,I21.40, I21.41,I21.42, I21.49, I21.0, I21.1, I21.2, I21.3, I20.1, I20.9, I25.11, I25.10, I25.13, I25.19, I25.14, I20.80, I25.9 I24.0, R94.30, I25.5, I25.2, I24.8                                                                                                                                                                                                                                                                                                                                                                        |
| Cerebral vascular disease                          | I20.88, I25.8, I23.82, Z95.1,Z95.5, I25.6,I22.0,I22.1,I22.9, I20.0                                                                                                                                                                                                                                                                                                                                                                                                                                                                                          |
| Diabetes                                           | I63.4, I63.9, I63.1, I63.0, I63.3,I63.5, I63.2, I65.1,I65.2,I66.0, I65.3, I66.4, I65.8 I66.8, I66.9, I65.0, I64., G45.9, I67.2, I67.9                                                                                                                                                                                                                                                                                                                                                                                                                       |
| Renal                                              | H28.0G59.0G63.2H36.0E23.2E10.42E10.30E10.52E10.35E10.22E10.21 E10.23E10.70E10.63E10.20E10.10E10.78E10.60E10.33E10.28E10.38E10.50E10.4E10.64E10.31E10.32E10.9E11.36E11.42E11.30E11.52E11.0E11.35E11.22E11.21E11.23E11.71E11.70E11.63E11.20E11.10 E11.40, E11.78, E11.60, E11.33, E11.68, E11.28, E11.38, E11.50                                                                                                                                                                                                                                              |
| Preoperative laboratory value (Creatinine >176 mm) | E11.51, E11.41, E11.64, E11.31, E11.32, E11.9, E13.42, E13.52, E13.35, E13.22 E13.63, E13.1, E13.78, E13.60, E13.33, E13.68, E13.28, E13.41, E13.64, E13.9 E14.30, E14.52, E14.35, E14.22, E14.21, E14.23, E14.71, E14.20, E14.10, E14.11 E14.78, E14.33, E14.41, E14.31, E14.32, E14.61,E14.9E11.500E11.501E11.509E11.511E11.513E11.519E11.900E11.901E11.903E11.909E13.229E13.589E13.599 E13.689E13.900E13.909E14.300E14.301E14.309E14.320E14.321E14.329E14.330E14.349E14.350E14.351E14.354E14.380E14.390E14.429E14.700E14.781E14.789E14.901E14.904E14.909 |
| ICD 10 coding for the postoperative outcomes       |                                                                                                                                                                                                                                                                                                                                                                                                                                                                                                                                                             |
| Morbidity                                          | ICD 10 code                                                                                                                                                                                                                                                                                                                                                                                                                                                                                                                                                 |
| Myocardial ischemia                                | I24.9,I21.9,I21.4,I21.40,I21.41,I21.42,I21.49,I21.1,I21.2,I21.3,I20.1,I20.9,I20.80,I24.0,R94.30,I25.5,I24.8,I20.88,I23.82,I25.6,I22.0,I22.1,I22.9,I20.0,I24.1                                                                                                                                                                                                                                                                                                                                                                                               |
| Cerebral ischemia                                  | I63.4,I63.9,I63.1,I63.0,I63.3,I63.5,I63.2,I65.1,I65.2,I66.0,I65.3,I66.4,I65.8,I66.8,I66.9,I65.0,I64.,G45.9                                                                                                                                                                                                                                                                                                                                                                                                                                                  |
| Acute renal failure                                | N17.0,N17.8,N17.9,N19.N28.0,N99.0,Z99.2                                                                                                                                                                                                                                                                                                                                                                                                                                                                                                                     |
| Pulmonary embolism                                 | I26.9, I26.0                                                                                                                                                                                                                                                                                                                                                                                                                                                                                                                                                |
| Cardiac arrest                                     | I46.0,I46.1,I46.9,I49.00                                                                                                                                                                                                                                                                                                                                                                                                                                                                                                                                    |
| Atrial fibrillation                                | I48.0, I48.1                                                                                                                                                                                                                                                                                                                                                                                                                                                                                                                                                |
| Myocardial infarction                              | I24.9,I21.4,I21.40,I21.41,I21.42,I21.49,I21.0,I21.1,I21.2,I21.3,R94.30,I25.5,I24.8,I23.8, I25.6,I22.0,I22.1,I22.9,I24.1                                                                                                                                                                                                                                                                                                                                                                                                                                     |
| Congestive heart failure                           | I50, I 50.1,I50.20,I50.21, I50.23,I50.4,I50.41, I50.43, I50.9                                                                                                                                                                                                                                                                                                                                                                                                                                                                                               |

CHF = congestive heart failure; ICD = international classification of diseases; RCRI = revised cardiac risk index.
